# Supplementary material for: OrtSuite: from genomes to prediction of microbial interactions within targeted ecosystem processes
Source: Life Sci Alliance. 2021 Sep 27;4(12):e202101167. doi: 10.26508/lsa.202101167 (PMC8500227; doi:10.26508/lsa.202101167)
Supplement: Supplementary file 3 [file LSA-2021-01167_TableS3.xls]

## Sheet: Saraivaetal_Additionalfile_15_T
Table S3. Statistics obtained during the clustering of protein orthologs using the Test_genome_set. Results include numbers of species, genes, clusters and genes per cluster. Output is generated by OrthoFinder.
Number of species	12
Number of genes	69193
Number of genes in orthogroups	58353
Number of unassigned genes	10840
Percentage of genes in orthogroups	84.3
Percentage of unassigned genes	15.7
Number of orthogroups	9533
Number of species-specific orthogroups	1147
Number of genes in species-specific orthogroups	3087
Percentage of genes in species-specific orthogroups	4.5
Mean orthogroup size	6.1
Median orthogroup size	3
G50 (assigned genes)	10
G50 (all genes)	7
O50 (assigned genes)	1480
O50 (all genes)	2096
Number of orthogroups with all species present	541
Number of single-copy orthogroups	197
Date	2020-05-19
Orthogroups file	Orthogroups.tsv
Unassigned genes file	Orthogroups_UnassignedGenes.tsv
Per-species statistics file	Statistics_PerSpecies.tsv
Overall statistics file	Statistics_Overall.tsv
Orthogroups shared between species file	Orthogroups_SpeciesOverlaps.tsv
Average number of genes per-species in orthogroup	Number of orthogroups	Percentage of orthogroups	Number of genes	Percentage of genes
<1	8275	86.8	31543	54.1
'1	1007	10.6	14966	25.6
'2	141	1.5	3924	6.7
'3	44	0.5	1792	3.1
'4	16	0.2	871	1.5
'5	14	0.1	898	1.5
'6	6	0.1	455	0.8
'7	7	0.1	630	1.1
'8	8	0.1	815	1.4
'9	3	0	347	0.6
'10	1	0	122	0.2
11-15	9	0.1	1455	2.5
16-20	1	0	241	0.4
21-50	1	0	294	0.5
51-100	0	0	0	0
101-150	0	0	0	0
151-200	0	0	0	0
201-500	0	0	0	0
501-1000	0	0	0	0
'1001+	0	0	0	0
Number of species in orthogroup	Number of orthogroups
1	1147
2	3491
3	1370
4	796
5	492
6	447
7	385
8	238
9	229
10	229
11	168
12	541
