# Supplementary material for: OrtSuite: from genomes to prediction of microbial interactions within targeted ecosystem processes
Source: Life Sci Alliance. 2021 Sep 27;4(12):e202101167. doi: 10.26508/lsa.202101167 (PMC8500227; doi:10.26508/lsa.202101167)
Supplement: Supplementary file 9 [file LSA-2021-01167_TableS9.xls]

## Sheet: Saraivaetal_Supplementarydata_T
Table S9. Mapping of species annotated with KEGG Ortholog (KO) identifiers from ORAdb using a restrictive search e-value cutoff of 1E-16. Species identifiers: (adv) Acinetobacter defluvii WCHA30, (ath) Arabidopsis thaliana, (aza) Azoarcus sp. KH32C, (azd) Azoarcus sp. DN11, (azi) Azoarcus sp. CIB, (bced) Burkholderia cepacia DDS 7H-2, (bvi) Burkholderia vietnamiensis G4, (cyq) Cycloclasticus sp. …
	adv	ath	aza	azd	azi	bced	bvi	cyq	cza	dor	eba	lcm	magx	parb	rrz	shd	sscu	tmz
K01666	1	1	1	0	1	0	1	1	1	1	1	0	1	1	1	0	1	1
K18365	1	0	0	1	1	1	1	1	1	1	0	0	1	1	0	1	0	1
K23351	1	0	1	1	1	1	1	1	1	1	1	0	0	1	1	1	1	1
K16173	1	1	1	1	1	1	1	1	1	1	1	1	1	1	1	1	1	1
K00252	1	1	1	1	1	1	1	1	1	1	1	1	1	1	1	1	1	1
K00626	1	1	1	1	1	1	1	1	1	1	1	1	1	1	1	1	1	1
K01692	1	1	1	1	1	1	1	1	1	1	1	1	1	1	1	1	0	1
K07514	0	0	1	0	1	0	1	0	0	0	1	1	0	0	0	0	0	0
K07537	0	0	1	1	1	0	0	0	0	0	1	0	1	0	0	1	0	1
K01782	1	0	1	1	1	0	1	0	0	0	1	1	1	0	1	1	0	1
K15016	1	1	1	0	1	0	1	0	0	1	1	1	1	1	1	1	0	0
K13767	0	0	1	0	1	0	1	0	0	0	0	0	0	0	0	1	1	0
K00074	1	1	1	1	1	1	1	0	0	1	1	1	1	1	1	1	0	1
K07511	0	0	1	0	1	1	1	1	0	0	0	1	0	0	0	1	0	0
K07516	1	1	1	1	1	1	1	1	1	1	1	1	1	1	1	1	1	1
K01715	1	1	1	1	1	1	1	1	1	1	1	1	1	1	1	1	1	1
K07515	0	0	1	0	1	0	0	0	0	0	0	1	0	1	0	0	0	0
K00022	1	1	1	1	1	1	1	1	1	1	1	1	1	1	1	1	1	1
K01825	1	0	1	0	1	0	1	0	0	0	0	0	0	0	0	0	0	0
K10527	0	1	1	0	1	0	1	0	0	0	0	0	1	0	0	0	0	0
K07539	0	0	1	1	1	0	0	0	0	0	1	0	1	0	0	1	0	1
K07508	0	0	0	0	0	0	0	0	0	1	0	1	0	0	0	0	0	0
K00632	1	0	1	1	1	1	1	1	1	1	1	1	1	1	1	1	1	1
K07513	0	1	0	0	0	0	0	0	0	1	0	1	0	0	0	0	0	0
K07509	0	0	0	0	0	0	0	0	0	1	0	1	0	0	0	0	0	0
K04073	1	0	0	0	0	0	1	0	0	1	0	0	0	1	1	0	0	0
K18366	1	0	0	1	1	1	1	1	1	0	0	0	0	1	0	0	0	1
K23108	1	1	1	1	1	1	1	1	1	0	1	1	1	1	1	1	0	1
K04105	1	1	1	1	1	1	1	1	1	1	1	1	1	1	1	1	1	1
K04110	1	1	1	1	1	1	1	1	1	1	1	1	1	1	1	1	1	1
K10216	1	1	1	1	1	1	1	1	1	1	1	1	0	1	1	1	0	1
K00446	1	0	0	1	0	1	1	1	1	0	0	0	0	1	1	0	0	1
K07104	0	0	0	0	0	0	0	0	0	0	0	0	0	1	0	0	1	0
K04114	0	0	1	1	1	0	0	0	0	1	1	0	1	0	0	1	0	1
K04115	0	0	1	1	1	0	0	0	0	0	1	0	1	0	0	1	0	1
K19515	0	0	1	1	1	0	0	1	1	1	1	0	1	0	0	1	0	1
K05784	1	1	1	1	1	1	1	1	1	1	1	1	1	1	1	1	1	1
K07548	1	1	1	1	1	1	1	1	1	1	1	1	1	1	1	1	1	1
K08683	1	1	1	1	1	1	1	1	1	1	1	1	1	1	1	1	1	1
K07547	0	0	0	1	1	1	1	1	0	0	1	0	0	0	1	0	0	0
K05783	1	1	1	1	1	1	1	1	1	1	1	1	1	1	1	1	1	1
K02554	1	0	0	0	0	1	1	1	1	1	0	0	0	1	1	0	0	0
K18364	0	0	0	1	1	1	1	1	1	0	0	0	0	1	0	0	0	1
K01617	0	0	0	1	0	1	1	1	1	0	0	0	0	1	1	0	0	1
K04112	0	0	1	1	1	0	0	0	0	1	1	0	1	0	1	1	0	1
K04113	0	0	1	1	1	0	0	0	0	1	1	0	1	0	1	1	0	1
K01615	1	1	1	1	1	1	1	1	1	1	1	1	1	0	1	1	0	1
K20509	0	0	0	0	0	0	0	1	1	1	0	0	0	0	0	0	0	0
K05549	1	1	1	1	1	1	1	1	1	0	0	0	0	1	1	0	0	1
K00132	0	0	1	0	0	0	0	0	0	1	0	0	0	1	1	0	0	0
K07538	0	1	1	1	1	1	1	1	1	1	1	1	1	1	1	1	1	1
K05550	1	0	0	0	0	1	1	1	1	0	0	0	0	1	1	0	0	1
